# Supplementary material for: Systematic Review and Meta-Analysis: Prevalence of Non-Alcoholic Fatty Liver Disease and Liver Fibrosis in Patients with Inflammatory Bowel Disease
Source: MDPI journal article supplement (doi:10.3390/nu15214507), 2023-10-24
Supplement: s1 [file s1]

# Prevalence of Non-Alcoholic Fatty Liver Disease and Liver Fibrosis in Patients with Inflammatory Bowel Disease: A Systematic Review and Meta-Analysis

## Supplementary Material

**Table S1.** Search strategies carried out in three bibliographic databases for documents that report on prevalence of non-alcoholic fatty liver disease in patients with inflammatory bowel disease and number of documents retrieved.

| Database | Search Strategy                                                                                                                                                                                                                                                                                                                                                                                                                   | Documents (n) |
|----------|-----------------------------------------------------------------------------------------------------------------------------------------------------------------------------------------------------------------------------------------------------------------------------------------------------------------------------------------------------------------------------------------------------------------------------------|---------------|
| PubMed   | ("Fatty Liver"[MeSH Terms] OR "Non-alcoholic Fatty Liver Disease"[MeSH Terms]) AND ("Inflammatory Bowel Diseases"[MeSH Terms] OR "Crohn Disease"[MeSH Terms] OR "colitis, ulcerative"[MeSH Terms]) AND ("Fatty Liver"[MeSH Terms] OR "Non-alcoholic Fatty Liver Disease"[MeSH Terms] OR "metabolic associated fatty liver disease"[All Fields] OR "nonalcoholic steato-hepatitis"[All Fields] OR "hepatic steatosis"[All Fields]) | 157           |
| Scopus   | ("fatty liver" OR "Non-alcoholic Fatty Liver Disease" OR "metabolic associated fatty liver disease" OR "nonalcoholic steato-hepatitis" OR "hepatic steatosis") AND ("inflammatory bowel disease" OR "crohn" OR "ulcerative colitis") AND ("incidence" OR "prevalence" OR "epidemiology")                                                                                                                                          | 255           |
| Embase   | (fatty AND ('liver'/exp OR liver) OR 'non alcoholic') AND fatty AND ('liver'/exp OR liver) AND ('disease'/exp OR disease) AND (inflammatory AND ('bowel'/exp OR bowel) AND ('disease'/exp OR disease) OR crohn* OR ulcerative) AND ('colitis'/exp OR colitis) AND ('incidence'/exp OR incidence OR 'prevalence'/exp OR prevalence OR 'epidemiology'/exp OR epidemiology) AND [embase]/lim                                         | 406           |

**Table S2.** Characteristics of Studies Involving Prevalence of non-alcoholic fatty liver disease (NAFLD) in patients with inflammatory bowel disease (IBD).

| Author. Year           | Country  | Study Design    | Disease Type | IBD Cohort, Mean Age (Range) | Active Disease (%) | IBD Activity Measurement Tool | Diagnostic Method of NAFLD | Mean Age at Diagnosis of NAFLD | Diagnostic Method of Fibrosis |
|------------------------|----------|-----------------|--------------|------------------------------|--------------------|-------------------------------|----------------------------|--------------------------------|-------------------------------|
| Full articles          |          |                 |              |                              |                    |                               |                            |                                |                               |
| Abomhya A, et al. 2022 | USA      | Retrospective   | CD           | 53 (36-68)                   | -                  | -                             | -                          | 53 (42-63)                     | -                             |
|                        |          |                 | IBD          | 40.6 ± 12.8                  | -                  | -                             | CAP/HSI/FLI                | 37.8                           | -                             |
| Arieira C, et al. 2019 | Portugal | Cross-sectional | CD           | -                            | -                  | -                             | CAP/HSI/FLI                | -                              | -                             |
|                        |          |                 | UC           | -                            | -                  | -                             | CAP/HIS/FLI                | -                              | -                             |

| Table 1. Summary of the studies included in the meta-analysis |               |                                    |         |                         |                     |              |                |                    |                     |
|---------------------------------------------------------------|---------------|------------------------------------|---------|-------------------------|---------------------|--------------|----------------|--------------------|---------------------|
| Author (Year)                                                 | Country       | Study Design                       | Disease | Prevalence (%)          | Prevalence (95% CI) | Index Test   | Reference Test | Prevalence (%)     | Prevalence (95% CI) |
| Bargiggia S, et al. 2003                                      | Italia        | Prospective                        | IBD     | -                       | 61.6                | -            | US             | -                  | -                   |
|                                                               |               |                                    | CD      | 38±14.4                 | 58.5                | CDAI         | US             | -                  | -                   |
|                                                               |               |                                    | UC      | 39±14.4                 | 66.5                | -            | US             | -                  | -                   |
| Bessissow T, et al. 2016                                      | Canada        | Retrospective                      | IBD     | 33.7 (25.1-46.9)        | 48                  | HBI/PMS      | HSI            | 37.7 (27.3-50.1)   | FIB-4               |
| Bosch DE, et al. 2017                                         | United States | Retrospective                      | IBD     | 47 (43-51)              | -                   | -            | US/MRI         | 49 (44-55)         | -                   |
| Carrillo-Palau M, et al. 2021                                 | Spain         | Cross-sectional                    | IBD     | 48 ± 10                 | -                   | -            | US             | -                  | TE                  |
|                                                               |               |                                    | CD      | -                       | 11/14               | CDAI/HBI     | US             | -                  | TE                  |
|                                                               |               |                                    | UC      | -                       | 17                  | PMS          | US             | -                  | TE                  |
| Chicco F, et al. 2021                                         | Italy         | Prospective                        | IBD     | 50                      | 24.6                | -            | US             | -                  | -                   |
|                                                               |               |                                    | CD      | 48 (34.8-57.5)          | 15.5                | CDAI         | US             | -                  | -                   |
|                                                               |               |                                    | UC      | 52 (44.5-61.3)          | 31                  | PMS          | US             | -                  | -                   |
| Cohen ME, et al. 2021                                         | United States | Prospective                        | IBD     | 14.8 (13 - 16.7)        | 61                  | PCDAI/ PUCAI | MRE-PDFF       | 13.6 (12.5 - 17.1) | MRE-PDFF            |
| Daniluk U, et al. 2021                                        | Poland        | Retrospective                      | IBD     | 14                      | 97.5                | PCDAI/ PUCAI | LFT/US/MRI     | -                  | -                   |
| Glassner K, et al. 2017                                       | USA           | Retrospective                      | IBD     | 19-82                   | -                   | -            | CT/UC/MRI      | 45 ± 14.1          | -                   |
| Hoffmann P, et al. 2020                                       | Germany       | Retrospective                      | IBD     | -                       | 74.9                | -            | US             | -                  | -                   |
|                                                               |               |                                    | CD      | -                       | 71.9                | HBI          | US             | 49 (20.0)          | -                   |
|                                                               |               |                                    | UC      | -                       | 81                  | SCCAI        | US             | 48.5 (18.5)        | -                   |
| Hong Q, et al. 2022                                           | China         | Retrospective                      | CD      | -                       | 47.4                | CDAI         | MR-PDFF        | 32 ± 11            | -                   |
| Kang MK, et al. 2020                                          | South Korea   | Retrospective                      | IBD     | 35 (36 - 49.5)          | 30.25               | CDAI/PMS     | CT             | 45.1 ± 13.6        | -                   |
| Kani HT, et al. 2019                                          | Turkey        | Retrospective                      | IBD     | 45.59 ± 11.72 (25 - 72) | -                   | -            | CAP            | -                  | -                   |
| Koller T, et al. 2017                                         | Slovakia      | Prospective                        | IBD     | 39 (30.0 - 52.75)       | -                   | -            | US             | -                  | -                   |
| Li D, et al. 2017                                             | China         | Retrospective cases and controls   | IBD     | -                       | -                   | -            | US             | -                  | -                   |
|                                                               |               |                                    | CD      | 36.2 ± 12.62            | -                   | -            | US             | -                  | -                   |
|                                                               |               |                                    | UC      | 48.94 ± 15.26           | -                   | -            | US             | -                  | -                   |
| Likhitsup A, et al. 2019                                      | USA           | Retrospective                      | IBD     | 38.6±15                 | -                   | -            | CT scan        | -                  | -                   |
| Magrí S, et al. 2019                                          | Italy         | Prospective                        | IBD     | -                       | 27                  | -            | US             | 53.9 ± 12.9        | TE                  |
|                                                               |               |                                    | CD      | -                       | 42.2                | CDAI         | US             | -                  | TE                  |
|                                                               |               |                                    | UC      | -                       | 13.7                | PMS          | US             | -                  | TE                  |
| Mancina RM, et al. 2020                                       | Italy         | Cross-sectional cases and controls | IBD     | -                       | 17.9                | -            | CAP            | -                  | TE                  |
|                                                               |               |                                    | CD      | 42.6 ± 13               | 18.9                | HBI          | CAP            | -                  | TE                  |
|                                                               |               |                                    | UC      | 46.6 ± 11               | 17.2                | PMS          | CAP            | -                  | TE                  |
| McHenry S, et al. 2020                                        | USA           | Retrospective                      | CD      | -                       | -                   | -            | MR-PDFF        | -                  | FIB-4               |
| Morsy KH, et al. 2012                                         | Egypt         | Prospective                        | UC      | 31±8 (16-46)            | 100                 | Mayo         | US+LFT         | -                  | -                   |
| Nguyen DL, et al. 2014                                        | USA           | Retrospective                      | IBD     | -                       | -                   | -            | ICD-9-CM       | -                  | -                   |
|                                                               |               |                                    | CD      | 49.38 ± 15.29           | -                   | -            | ICD-9-CM       | -                  | -                   |

|                                  |                 |                                    | UC  | 48.1 ± 17.45  | -    | -                      | ICD-9-CM       | -           | -                 |
|----------------------------------|-----------------|------------------------------------|-----|---------------|------|------------------------|----------------|-------------|-------------------|
| Paparo F, et al. 2012            | Italy           | Retrospective                      | CD  | 50.2±15.9     | -    | -                      | CT             | -           | -                 |
| Perrett AD, et al. 1971          | UK              | Retrospective                      | UC  | 12-80         | -    | -                      | LFT/Biopsy     | -           | -                 |
| Perrett AD, et al. 1971          | UK              | Retrospective                      | CD  | 16-82         | -    | -                      | LFT/Biopsy     | -           | -                 |
| Principi M, et al. 2018          | Italy           | Retrospective cases and controls   | IBD | 45.2±15.9     | 27.5 | HBI/PMS                | US             | 49.9±15.8   | -                 |
| Ritaccio G, et al. 2021          | USA             | Retrospective                      | IBD | 48±15.6       | -    | -                      | Imaging/biopsy | 50.6±13.6   | NFS               |
| Rodriguez-Duque JC, et al. 2023  | Spain           | Cross-sectional cases and controls | IBD | 52 (19-76)    | 10.7 | HBI/PMS                | US             | 55 (23-76)  | TE + Biopsy       |
| Sagami S, et al. 2017            | Japan           | Retrospective                      | CD  | 36.9±12.2     | 41.6 | CDAI                   | US             | 42 ± 12.7   | -                 |
| Saroli Palumbo C, et al. 2019    | Canada          | Prospective                        | IBD | 42.4          | 28.6 | HBI/PMS                | CAP/MRI-PDFF   | 50.2 ± 12.8 | TE/APRI/FIB-4/NFS |
| Silva J, et al. 2019             | Brazil          | Cross-sectional                    | IBD | -             | -    | -                      | US/MRI/LFT     | -           | US/MRI/LFT        |
| Simon TG, et al. 2018            | USA             | Cross-sectional                    | CD  | 40 ± 15       | 9.7  | -                      | CT             | -           | FIB-4             |
| Sourianarayanane A, et al. 2013  | USA             | Retrospective                      | IBD | -             | -    | -                      | US/CT/MRI      | 46±13.3     | -                 |
| Spagnuolo R, et al. 2020         | Italy           | Retrospective                      | IBD | 44±13         | 5.6  | HBI/Mayo score/ SES-CD | CAP            | -           | TE                |
| Van Lingen E, et al. 2022        | The Netherlands | Prospective                        | IBD | 42.7 (16.0)   | 31.7 | HBI/PMS                | CAP            | -           | TE                |
| Veltkamp C, et al. 2022          | Germany         | Retrospective                      | IBD | 42 (31-57)    | -    | -                      | CAP            | 45 (40-52)  | TE                |
| Voss J, et al. 2021              | UK              | Cross-sectional                    | IBD | -             | -    | -                      | LFT/ICD-Codes  | -           | -                 |
|                                  |                 |                                    | CD  | 56.6±8.1      | -    | -                      | LFT/ICD-Codes  | -           | -                 |
|                                  |                 |                                    | UC  | 57.6±7.9      | -    | -                      | LFT/ICD-Codes  | -           | -                 |
| Yamamoto-Furusho JK, et al. 2010 | Mexico          | Prospective                        | UC  | 31.4 ± 13.2   | -    | -                      | LFT/US/biopsy  | -           | Biopsy            |
| Yen H-H, et al. 2021             | Taiwan          | Retrospective                      | IBD | 37.26 ± 13.16 | -    | -                      | CAP            | -           | LSM               |
|                                  |                 |                                    | CD  | 34.58 ± 12.94 | -    | -                      | CAP            | -           | LSM               |
|                                  |                 |                                    | UC  | 39.4 ± 13.08  | -    | -                      | CAP            | -           | LSM               |
| Abstracts                        |                 |                                    |     |               |      |                        |                |             |                   |
| Almohannadi M, et al. 2020       | Qatar           | Retrospective                      | IBD | 36.9 ± 13.2   | -    | -                      | -              | -           | -                 |

| Table 1. Studies included in the meta-analysis |          |                 |     |               |      |      |            |         |        |
|------------------------------------------------|----------|-----------------|-----|---------------|------|------|------------|---------|--------|
| Andrade P, et al. 2016                         | Portugal | Retrospective   | IBD | 43±12         | -    | -    | Biopsy/LFT | -       | -      |
| Atanassova A, et al. 2019                      | Bulgaria | Retrospective   | IBD | -             | 46.3 | CDAI | US/LFT     | -       | -      |
|                                                |          |                 | CD  | -             |      |      | Mayo       | -       | -      |
|                                                |          |                 | UC  | -             |      |      |            |         |        |
| Balaban D. et al. 2017                         | Romania  | Prospective     | IBD | 45 ± 15       | 51.4 | -    | US/HIS/CAP | -       | -      |
|                                                |          |                 | CD  | -             |      |      | -          | -       | -      |
|                                                |          |                 | UC  | -             |      |      |            |         |        |
| Basaranoglu M, et al. 2015                     | Turkey   | Retrospective   | IBD | -             | -    | -    | US         | -       | -      |
| Ben Mohamed A, et al. 2019                     | Tunisia  | Retrospective   | CD  | 42.74(18-88)  | -    | -    | US         | -       | -      |
| Cahill J, et al. 2019                          | USA      | Retrospective   | IBD | -             | -    | -    | -          | -       | -      |
| Cheikhna F, et al. 2020                        | Morocco  | Retrospective   | IBD | 34.71 (14-82) | -    | -    | -          | -       | -      |
| Chhina S, et al. 2014                          | USA      | Retrospective   | IBD | -             | -    | -    | US         | -       | -      |
| Crispino F, et al. 2022                        | Italy    | Retrospective   | IBD | 46.1±13.4     | -    | -    | HSI/CAP    | -       | -      |
| Demir M. 2020                                  | Turkey   | Retrospective   | IBD | 44±18         | -    | -    | US         | -       | FIB-4  |
| Di Girolamo M, et al. 2013                     | Italy    | Retrospective   | IBD | -             | -    | -    | US         | -       | -      |
| Domislovic V, et al. 2019                      | Croatia  | Retrospective   | IBD | 40            | -    | -    | HSI        | -       | FIB-4  |
| Dorobăt A, et al. 2018                         | Romania  | Retrospective   | IBD | 37            | -    | -    | US         | -       | -      |
| Dundulis J, et al. 2014                        | USA      | Retros pective  | IBD | 38.6±14.9     | -    | -    | MRI        | -       | -      |
| Dunn M, et al. 2012                            | USA      | Prospective     | IBD | -             | -    | -    | -          | -       | Biopsy |
| El Mahjoubi S, et al. 2017                     | Morocco  | Retrospective   | IBD | -             | -    | -    | US         | -       | -      |
| Elchert JA, et al. 2018                        | USA      | Retrospective   | CD  | -             | -    | -    | -          | -       | -      |
| Elchert JA, et al. 2018                        | USA      | Retrospective   | UC  | -             | -    | -    | -          | -       | -      |
| Erzin Y, et al. 2015                           | Turkey   | Cross-sectional | IBD | 44.39±14.1    | -    | -    | US         | 47.4±13 | -      |
| Gilcă-Blanariu G, et al. 2020                  | Romania  | Retrospective   | IBD | 49.19±14.7    | -    | -    | -          | -       | -      |
| Gu P, et al. 2022                              | USA      | Retrospective   | IBD | 52.3±15.22    | -    | -    | CT         | -       | -      |
| Gupta A, et al. 2022                           | India    | Prospective     | UC  | 29±10.6       | -    | -    | CAP        | -       | -      |

| Table 1. Summary of the studies included in the meta-analysis |          |                              |         |                    |                     |                     |                 |                |                 |
|---------------------------------------------------------------|----------|------------------------------|---------|--------------------|---------------------|---------------------|-----------------|----------------|-----------------|
| Author (Year)                                                 | Country  | Study Design                 | Disease | Prevalence (%)     | Prevalence (95% CI) | Prevalence (95% CI) | Diagnostic Test | Prevalence (%) | Diagnostic Test |
| Iannone A, et al. 2017                                        | Italy    | Retrospective cases-controls | IBD     | 46.3±15.6          | -                   | -                   | US              | -              | TE              |
| Jubin K, et al. 2019                                          | India    | Retrospective                | IBD     | 38.3(14-67)        | -                   | -                   | US              | -              | TE              |
| Karmiris K, et al. 2014                                       | Greece   | Retrospective                | IBD     | 32.9(23-48.4)      | -                   | -                   | Imaging         | -              | -               |
| Kasarala G, et al. 2017                                       | USA      | Retrospective                | IBD     | 52.13              | -                   | -                   | ICD-9 Codes     | 50.55          | -               |
| Kumar-Dixit V, et al. 2020                                    | India    | Retrospective                | IBD     | -                  | -                   | -                   | -               | -              | -               |
| Le NHQ, et al. 2014                                           | USA      | Retrospective                | IBD     | 33.8               | 50                  | -                   | HIS/US/CT       | 40.2           | -               |
| Lee A, et al. 2019                                            | USA      | Retrospective                | IBD     | -                  | -                   | -                   | Imaging         | -              | -               |
| Lee AS, et al. 2022                                           | USA      | Retrospective                | CD      | >18                | -                   | -                   | MRI             | -              | FIB-4           |
| Lopes M, et al. 2021                                          | Brazil   | Cross-sectional              | IBD     | 45.32±13.59        | -                   | -                   | US              | -              | -               |
| Martínez-Domínguez SJ, et al. 2022                            | Spain    | Prospective                  | IBD     | 50 (40-60)         | 10                  | -                   | US/CAP          | -              | TE              |
| Mehrotra P, et al. 2013                                       | India    | Prospective                  | UC      | 42±4               | -                   | -                   | US + TE + LFT   | -              | -               |
| Mehrotra P, et al. 2018                                       | India    | Retrospective                | UC      | -                  | -                   | -                   | TE              | -              | -               |
| Mohammed T, et al. 2012                                       | Morocco  | Retrospective                | IBD     | 37.7 (19-60)       | -                   | -                   | US              | -              | -               |
| Monteserin L, et al. 2017                                     | Spain    | Retrospective                | IBD     | 47.9±12.54         | -                   | -                   | US+CAP+HSI+FLI  | -              | TE              |
| Nasrullayeva F, et al. 2020                                   | Turkey   | Retrospective                | IBD     | 44.45±12.71        | -                   | -                   | LFT + US/CT/MRI | -              | -               |
| Patel NP, et al. 2011                                         | India    | Prospective                  | IBD     | -                  | -                   | -                   | CT/MRI/biopsy   | -              | -               |
|                                                               |          |                              | CD      | 40.6 ± 11.2 (6-82) | -                   | -                   | CT/MRI/biopsy   | -              | -               |
|                                                               |          |                              | UC      | 34.1 ± 14.2 (6-83) | -                   | -                   | CT/MRI/biopsy   | -              | -               |
| Regner E, et al. 2020                                         | USA      | Retrospective                | IBD     | 15±2.4 (10-18)     | -                   | -                   | US/CT/MRI       | -              | -               |
| Restellini S, et al. 2017                                     | Canada   | Prospective                  | IBD     | 42.5±15.2          | 31                  | HBI/PMS             | CAP             | -              | TE              |
| Sarmini MT, et al. 2019                                       | USA      | Retrospective                | CD      | -                  | -                   | -                   | -               | -              | -               |
| Sarmini MT, et al. 2019                                       | USA      | Retrospective                | UC      | -                  | -                   | -                   | -               | -              | -               |
| Scrive B, et al. 2021                                         | Italy    | Prospective                  | IBD     | 46.2±15.2          | -                   | -                   | CAP+HSI         | 45.4±12.3      | CAP             |
| Stoleru G, et al. 2020                                        | USA      | Retrospective                | IBD     | -                  | -                   | -                   | Imaging/biopsy  | 50.6 ± 13.6    | NFS             |
| Sousa P, et al. 2021                                          | Portugal | Retrospective                | IBD     | 46±14              | -                   | -                   | CAP             | -              | TE              |

|                              |           |               |     |            |   |   |     |            |    |
|------------------------------|-----------|---------------|-----|------------|---|---|-----|------------|----|
| Thayumanavan JG, et al. 2010 | India     | Prospective   | IBD | 31-40      | - | - | -   | -          | -  |
| Thin LW, et al. 2012         | Australia | Prospective   | IBD | 43 ± 15    | - | - | TE  | -          | TE |
| Tirath A, et al. 2019        | India     | Prospective   | CD  | 35 (26-49) | - | - | CAP | 39 (30-49) | TE |
| Young S, et al. 2015         | USA       | Retrospective | CD  |            | - | - | -   | -          | -  |

IBD, Inflammatory bowel disease; CD, Crohn disease; UC, ulcerative colitis; NAFLD, Non-alcoholic fatty liver disease; LFT, Liver function tests; US, Ultrasound; CAP, Controlled attenuation parameter; HSI, hepatic steatosis index; FIB-4, fibrosis-4 index; MRI, Magnetic resonance imaging; CT, computed tomography; TE, Transient elastography; ICD codes: International Classification of Diseases codes; FLI, Fatty liver index; HBI, Harvey-Bradshaw Index; CDAI, Crohn disease activity index; NFS, NAFLD fibrosis score; PMS, Partial mayo score; PCDAI, Paediatric Crohn disease activity index; PUCAI, Paediatric ulcerative colitis activity index; MRE-PDFF, Magnetic Resonance Enterography Proton Density Fat Factor; SCCAI, Simple Clinical Colitis Activity Index; APRI, AST-to-Platelet Ratio Index; SES-CD, Simple Endoscopic Score for Crohn disease; LSM, Liver stiffness measure.

**Table S3.** Prevalence of non-alcoholic fatty liver disease and fibrosis in IBD cohorts.

| Author. Year                  | Disease Type | IBD n  | Male n (%)    | Female n (%)   | NAFLD n (%) | NAFLD Male n (%) | NAFLD Female n (%) | Fibrosis n (%) | MAFLD n (%) |
|-------------------------------|--------------|--------|---------------|----------------|-------------|------------------|--------------------|----------------|-------------|
| Abomhya A, et al. 2022        | CD           | 215049 | 90876 (42.3%) | 124176 (57.7%) | 5268 (2.4%) | 2139 (40.6%)     | 3129 (59.4%)       | -              | 1522 (0.7%) |
| Almohannadi M, et al. 2020    | IBD          | 913    | 550 (60.2%)   | 363 (39.8%)    | 108 (11.8%) | -                | -                  | -              | -           |
|                               | CD           | 383    | -             | -              | 45 (11.7%)  | -                | -                  | -              | -           |
|                               | UC           | 530    | -             | -              | 63 (11.9%)  | -                | -                  | -              | -           |
| Andrade P, et al. 2016        | IBD          | 54     | 35 (64.8%)    | 19 (35.2%)     | 13 (24.1%)  | -                | -                  | -              | -           |
| Ariera C, et al. 2019         | IBD          | 161    | 75 (46.6%)    | 86 (53.4%)     | 73 (45.3%)  | 42 (57.5%)       | 31 (42.5%)         | -              | 21 (13%)    |
| Atanassova A, et al. 2019     | IBD          | 320    | -             | -              | 178 (55.6%) | -                | -                  | -              | -           |
|                               | CD           | 160    | -             | -              | 95 (59.4%)  | -                | -                  | -              | -           |
|                               | UC           | 160    | -             | -              | 83 (51.9%)  | -                | -                  | -              | -           |
| Balaban D, et al. 2017        | IBD          | 62     | 31 (50%)      | 31 (50%)       | 23 (37.1%)  | -                | -                  | -              | -           |
| Bargiggia S, et al. 2003      | IBD          | 511    | 263 (51.5%)   | 248 (48.5%)    | 194 (37.9%) | -                | -                  | -              | -           |
|                               | CD           | 311    | 144 (46.3%)   | 167 (53.7%)    | 123 (39.5%) | -                | -                  | -              | -           |
|                               | UC           | 200    | 119 (59.5%)   | 81 (40.5%)     | 71 (35.5%)  | -                | -                  | -              | -           |
| Basaranoglu M, et al. 2015    | IBD          | 2700   | 1593 (59%)    | 1107 (41%)     | 1080 (40%)  | -                | -                  | -              | -           |
| Ben Mohamed A, et al. 2019    | CD           | 86     | 42 (48.8%)    | 44 (51.2%)     | 21 (24.4%)  | 7 (33.3%)        | 14 (66.6%)         | -              | -           |
| Bessissow T, et al. 2016      | IBD          | 321    | 151 (47%)     | 170 (53%)      | 108 (33.6%) | 47 (43.5%)       | 61 (56.5%)         | 7 (6.4%)       | 9 (2.8%)    |
|                               | CD           | 217    | -             | -              | 81 (37.3%)  | -                | -                  | -              | -           |
|                               | UC           | 104    | -             | -              | 27 (26%)    | -                | -                  | -              | -           |
| Bosch DE, et al. 2017         | IBD          | 93     | -             | -              | 34 (36.6%)  | 14 (48.3%)       | 15 (51.7%)         | -              | 6 (6.4%)    |
|                               | CD           | 39     | -             | -              | 24 (61.5%)  | -                | -                  | -              | -           |
|                               | UC           | 54     | -             | -              | 10 (18.5%)  | -                | -                  | -              | -           |
| Cahill J, et al. 2019         | IBD          | 1186   | 573 (48.3%)   | 613 (51.7%)    | 151 (12.7%) | 71 (47%)         | 80 (53%)           | -              | 79 (6.7%)   |
| Carrillo-Palau M, et al. 2021 | IBD          | 136    | -             | -              | 63 (46.3%)  | -                | -                  | -              | -           |

| Table 1. The prevalence of IBD in the world (2000-2022) |         |        |             |             |             |            |            |            |            |
|---------------------------------------------------------|---------|--------|-------------|-------------|-------------|------------|------------|------------|------------|
| Author, year                                            | Country | N      | IBD         | CD          | UC          | IBD        | CD         | UC         | IBD        |
| Cheikhna F, et al. 2020                                 | IBD     | 218    | 110 (50.5%) | 108 (49.5%) | 8 (3.7%)    | -          | -          | -          | -          |
| Chhina S, et al. 2014                                   | IBD     | 1304   | -           | -           | 126 (9.7%)  | -          | -          | -          | -          |
| Chicco F, et al. 2021                                   | IBD     | 142    | 76 (53.5%)  | 66 (46.5%)  | 58 (40.8%)  | -          | -          | -          | -          |
|                                                         | CD      | 58     | 36 (62.1%)  | 22 (37.9%)  | 27 (46.6%)  | -          | -          | -          | -          |
|                                                         | UC      | 84     | 40 (47.6%)  | 44 (52.4%)  | 31 (36.9%)  | -          | -          | -          | -          |
| Cohen ME, et al. 2021                                   | IBD     | 83     | 50 (60.2%)  | 33 (39.8%)  | 5 (6%)      | 4 (80%)    | 1 (20%)    | 0 (0%)     | 2 (2.4%)   |
|                                                         | CD      | 57     | -           | -           | 4 (7%)      | -          | -          | -          | -          |
|                                                         | UC      | 23     | -           | -           | 0           | -          | -          | -          | -          |
| Crispino F, et al. 2022                                 | IBD     | 227    | 110 (48.5%) | 117 (51.5%) | 71 (31.3%)  | -          | -          | -          | -          |
| Daniluk U, et al. 2021                                  | IBD     | 119    | 69 (58%)    | 50 (42%)    | 4 (3.4%)    | -          | -          | -          | -          |
|                                                         | CD      | 42     | -           | -           | 1 (2.4%)    | -          | -          | -          | -          |
|                                                         | UC      | 77     | -           | -           | 3 (3.9%)    | -          | -          | -          | -          |
| Demir M. 2020                                           | IBD     | 539    | 280 (51.9%) | 259 (48.1%) | 172 (31.9%) | -          | -          | 21 (12.2%) | -          |
| Di Girolamo M, et al. 2013                              | IBD     | 788    | -           | -           | 128 (16.2%) | -          | -          | -          | -          |
| Domislovic V, et al. 2019                               | IBD     | 250    | 130 (52%)   | 120 (48%)   | 91 (36.4%)  | -          | -          | 9 (9.9%)   | -          |
|                                                         | CD      | 167    | -           | -           | 61 (36.5%)  | -          | -          | 5 (8.2%)   | -          |
|                                                         | UC      | 83     | -           | -           | 30 (36.1%)  | -          | -          | 4 (13.3%)  | -          |
| Dorobăț A, et al. 2018                                  | IBD     | 135    | 80 (59.3%)  | 55 (40.7%)  | 27 (20%)    | -          | -          | -          | 16 (11.9%) |
|                                                         | CD      | 38     | -           | -           | 7 (18.4%)   | -          | -          | -          | -          |
|                                                         | UC      | 97     | -           | -           | 20 (20.6%)  | -          | -          | -          | -          |
| Dundulis J, et al. 2014                                 | IBD     | 70     | 31 (44.3%)  | 39 (55.7%)  | 29 (41.4%)  | -          | -          | -          | 8 (11.4%)  |
| Dunn M, et al. 2012                                     | IBD     | 1463   | -           | -           | 15 (1%)*    | -          | -          | -          | -          |
|                                                         | CD      | 873    | -           | -           | 9 (1%)*     | -          | -          | -          | -          |
|                                                         | UC      | 590    | -           | -           | 6 (1%)*     | -          | -          | -          | -          |
| El Mahjoubi S, et al. 2017                              | IBD     | 113    | -           | -           | 20 (17.7%)  | -          | -          | -          | -          |
| Elchert JA, et al. 2018                                 | CD      | 153810 | -           | -           | 520 (0.3%)  | -          | -          | -          | 468 (0.3%) |
| Elchert JA, et al. 2018                                 | UC      | 129300 | -           | -           | 370 (0.3%)  | -          | -          | -          | 359 (0.3%) |
| Erzin Y, et al. 2015                                    | IBD     | 276    | 132 (47.8%) | 144 (52.2%) | 100 (36.2%) | 56 (56%)   | 44 (44%)   | -          | -          |
|                                                         | CD      | 104    | -           | -           | 43 (41.3%)  | -          | -          | -          | -          |
|                                                         | UC      | 172    | -           | -           | 57 (33.1%)  | -          | -          | -          | -          |
| Gilcă-Blanariu G, et al. 2020                           | IBD     | 384    | 226 (58.9%) | 158 (41.1%) | 108 (28.1%) | -          | -          | -          | -          |
|                                                         | CD      | 118    | -           | -           | 34 (28.8%)  | -          | -          | -          | -          |
|                                                         | UC      | 266    | -           | -           | 74 (32.7%)  | -          | -          | -          | -          |
| Glassner K, et al. 2017                                 | IBD     | 421    | -           | -           | 56 (13.3%)  | -          | -          | -          | 23 (5.5%)  |
| Gu P, et al. 2022                                       | IBD     | 256    | 145 (56.6%) | 111 (43.4%) | 27 (10.5%)  | -          | -          | -          | -          |
| Gupta A, et al. 2022                                    | UC      | 107    | 60 (56.1%)  | 47 (43.9%)  | 29 (27.1%)  | -          | -          | -          | -          |
| Hoffmann P, et al. 2020                                 | IBD     | 455    | 226 (49.7%) | 229 (50.3%) | 213 (46.8)  | 115 (54%)  | 98 (46%)   | -          | 13 (2.9%)  |
|                                                         | CD      | 302    | 149 (49.3%) | 153 (50.7%) | 145 (48%)   | 75 (51.7%) | 70 (48.3%) | -          | 7 (2.3%)   |
|                                                         | UC      | 153    | 77 (50.3%)  | 76 (49.7%)  | 68 (15%)    | 40 (58.8%) | 28 (41.2%) | -          | 6 (3.9%)   |
| Hong Q, et al. 2022                                     | CD      | 340    | 242 (71.2%) | 98 (28.8%)  | 83 (24.4%)  | 64 (77.1%) | 19 (22.9%) | -          | 29 (8.5%)  |

|                                    |     |        |                |                |             |              |              |            |             |
|------------------------------------|-----|--------|----------------|----------------|-------------|--------------|--------------|------------|-------------|
| Iannone A, et al. 2017             | IBD | 378    | -              | -              | 106 (28%)   | -            | -            | -          | -           |
| Jubin K, et al. 2019               | IBD | 35     | 18 (51.4%)     | 17 (48.6%)     | 8 (22.9%)   | -            | -            | -          | -           |
|                                    | CD  | 18     | -              | -              | 6 (33.3%)   | -            | -            | -          | -           |
|                                    | UC  | 17     | -              | -              | 2 (11.8%)   | -            | -            | -          | -           |
| Kang MK, et al. 2020               | IBD | 443    | 284 (64.1%)    | 159 (35.9%)    | 49 (11.1%)  | 31 (63.3%)   | 18 (36.7%)   | -          | 18 (4.1%)   |
|                                    | CD  | 274    | -              | -              | 20 (7.3%)   | -            | -            | -          | -           |
|                                    | UC  | 169    | -              | -              | 29 (23.1%)  | -            | -            | -          | -           |
| Kani HT, et al. 2019               | IBD | 99     | 58 (58.6%)     | 41 (41.4%)     | 44 (44.4%)  | -            | -            | -          | -           |
|                                    | CD  | 58     | -              | -              | 28 (48.3%)  | -            | -            | -          | -           |
|                                    | UC  | 39     | -              | -              | 15 (38.5%)  | -            | -            | -          | -           |
| Karmiris K, et al. 2014            | IBD | 1489   | -              | -              | 159 (10.7%) | -            | -            | -          | -           |
| Kasarala G, et al. 2017            | IBD | 552887 | 235351 (42.6%) | 317536 (57.4%) | 5589 (1%)   | 2202 (39.4%) | 3387 (60.6%) | -          | 1246 (0.2%) |
|                                    | CD  | 352396 | -              | -              | 3767 (1.1%) | -            | -            | -          | -           |
|                                    | UC  | 200491 | -              | -              | 1822 (0.9%) | -            | -            | -          | -           |
| Koller T, et al. 2017              | IBD | 155    | -              | -              | 34 (21.9%)  | -            | -            | -          | -           |
| Kumar-Dixit V, et al. 2020         | IBD | 198    | 70 (35.4%)     | 128 (64.6%)    | 19 (9.6%)   | -            | -            | -          | -           |
|                                    | CD  | 58     | -              | -              | 4 (6.9%)    | -            | -            | -          | -           |
|                                    | UC  | 140    | -              | -              | 15 (10.7%)  | -            | -            | -          | -           |
| Le NHQ, et al. 2014                | IBD | 232    | 116 (50%)      | 116 (50%)      | 95 (40.9%)  | -            | -            | -          | -           |
| Lee A, et al. 2019                 | IBD | 168    | -              | -              | 47 (28%)    | -            | -            | -          | -           |
| Lee AS, et al. 2022                | CD  | 46     | -              | -              | 17 (37%)    | -            | -            | 2 (11.8%)  | -           |
| Li D, et al. 2017                  | IBD | 206    | 133 (64.6%)    | 73 (35.4%)     | 22 (10.7%)  | -            | -            | -          | -           |
|                                    | CD  | 137    | 90 (65.7%)     | 47 (34.3%)     | 15 (10.9%)  | -            | -            | -          | -           |
|                                    | UC  | 69     | 43 (62.3%)     | 26 (37.7%)     | 7 (10.1%)   | -            | -            | -          | -           |
| Likhitsup A, et al. 2019           | IBD | 70     | -              | -              | 31 (44.3%)  | -            | -            | -          | -           |
| Lopes M, et al. 2021               | IBD | 71     | 26 (36.6%)     | 45 (63.4%)     | 32 (45.1%)  | -            | -            | -          | -           |
| Magri S, et al. 2019               | IBD | 178    | 97 (54.5%)     | 81 (45.5%)     | 72 (40.4%)  | 51 (70.8%)   | 21 (29.2%)   | 21 (29.2%) | 22 (12.4%)  |
| Mancina RM, et al. 2020            | IBD | 95     | 57 (60%)       | 38 (40%)       | 68 (75.6%)  | -            | -            | -          | -           |
|                                    | CD  | 37     | 24 (64.9%)     | 13 (54.2%)     | 22 (59.5%)  | -            | -            | -          | -           |
|                                    | UC  | 58     | 33 (56.9%)     | 25 (43.1%)     | 46 (79.3%)  | -            | -            | -          | -           |
| Martínez-Domínguez SJ, et al. 2022 | IBD | 700    | 350 (50%)      | 350 (50%)      | 298 (42.6%) | -            | -            | 51 (17.1%) | -           |
| McHenry S, et al. 2020             | CD  | 311    | 155 (49.8%)    | 156 (50.2%)    | 118 (37.9%) | 55 (46.6%)   | 63 (53.4%)   | 38 (32.2%) | 77 (24.8%)  |
| Mehrotra P, et al. 2013            | UC  | 20     | 14 (70%)       | 6 (30%)        | 3 (15%)     | -            | -            | -          | -           |
| Mehrotra P, et al. 2018            | UC  | 128    | -              | -              | 23 (18%)    | -            | -            | -          | -           |
| Mohammed T, et al. 2012            | IBD | 199    | 61 (30.7%)     | 138 (69.3%)    | 23 (11.6%)  | -            | -            | -          | -           |
| Monteserin L, et al. 2017          | IBD | 88     | 41 (46.6%)     | 47 (53.4%)     | 33 (37.5%)  | -            | -            | 14 (42.4%) | -           |
| Morsy KH, et al. 2012              | UC  | 33     | 15 (45.5%)     | 18 (54.5%)     | 15 (45.5%)  | -            | -            | -          | -           |
| Nasrullayeva F, et al. 2020        | IBD | 470    | 260 (55.3%)    | 210 (44.7%)    | 179 (38.1%) | -            | -            | -          | -           |
|                                    | CD  | 264    | -              | -              | 102 (38.6%) | -            | -            | -          | -           |



| Table 1. Prevalence of IBD in the world (2000-2020) |         |        |              |              |              |              |              |            |             |
|-----------------------------------------------------|---------|--------|--------------|--------------|--------------|--------------|--------------|------------|-------------|
| Author                                              | Country | Year   | UC           | CD           | IBD          | IBD          | IBD          | IBD        | IBD         |
| Nguyen DL, et al. 2014                              | UC      | 201    | -            | -            | 75 (37.3%)   | -            | -            | -          | -           |
|                                                     | IBD     | 15284  | 8450 (55.3%) | 6834 (44.7%) | 2462 (16.1%) | -            | -            | -          | -           |
|                                                     | CD      | 6850   | 3349 (48.9%) | 3501 (51.1%) | 1391 (20.3%) | -            | -            | -          | -           |
| Paparo F, et al. 2012                               | UC      | 8434   | 5101 (60.5%) | 3333 (39.5%) | 1071 (12.7%) | -            | -            | -          | -           |
|                                                     | CD      | 221    | 114 (51.6%)  | 107 (48.4%)  | 24 (10.9%)   | -            | -            | -          | -           |
|                                                     | IBD     | 806    | 490 (60.8%)  | 296 (36.7%)  | 49 (6.1%)    | -            | -            | -          | -           |
| Patel NP, et al. 2011                               | CD      | 162    | 88 (54.3%)   | 74 (45.7%)   | 14 (8.6%)    | -            | -            | -          | -           |
|                                                     | UC      | 644    | 402 (62.4%)  | 242 (37.6%)  | 35 (5.4%)    | -            | -            | -          | -           |
|                                                     | IBD     | 50     | -            | -            | 19 (38%)     | -            | -            | -          | -           |
| Perrett AD, et al. 1971                             | CD      | 39     | -            | -            | 8 (20.5%)    | -            | -            | -          | -           |
| Principi M, et al. 2018                             | IBD     | 465    | 241 (51.8%)  | 224 (48.2%)  | 130 (28%)    | 70 (53.8%)   | 60 (46.2%)   | -          | 18 (3.8%)   |
|                                                     | CD      | 258    | -            | -            | 63 (24.4%)   | -            | -            | -          | -           |
|                                                     | UC      | 207    | -            | -            | 67 (32.4%)   | -            | -            | -          | -           |
| Regner E, et al. 2020                               | IBD     | 203    | -            | -            | 6 (3%)       | -            | -            | -          | 4 (2%)      |
|                                                     | CD      | 140    | -            | -            | 4 (2.9%)     | -            | -            | -          | 3 (2.1%)    |
|                                                     | UC      | 51     | -            | -            | 2 (3.9%)     | -            | -            | -          | 1 (2%)      |
| Restellini S, et al. 2017                           | IBD     | 349    | 170 (48.7%)  | 179 (51.2%)  | 135 (38.7%)  | -            | -            | 33 (24.4%) | -           |
| Ritaccio G, et al. 2021                             | IBD     | 1672   | 752 (45%)    | 920 (55%)    | 207 (12.4%)  | 96 (46.4%)   | 111 (53.6%)  | 6 (4.3%)   | 121 (7.2%)  |
|                                                     | CD      | 897    | -            | -            | 131 (14.6%)  | -            | -            | -          | -           |
|                                                     | UC      | 453    | -            | -            | 39 (8.6%)    | -            | -            | -          | -           |
| Rodríguez-Duque JC, et al. 2023                     | IBD     | 831    | 401 (48.2%)  | 430 (51.8%)  | 349 (42%)*   | 188 (53.9%)  | 161 (49.1%)  | 33 (9.5%)  | 349 (42%)   |
|                                                     | CD      | 389    | -            | -            | 166 (42.7%)* | -            | -            | -          | 166 (42.7%) |
|                                                     | UC      | 420    | -            | -            | 174 (41.4%)* | -            | -            | -          | 174 (41.4%) |
| Sagami S, et al. 2017                               | CD      | 303    | 226 (74.6%)  | 77 (25.4%)   | 66 (21.8%)   | 53 (80.3%)   | 13 (19.7%)   | -          | 24 (7.9%)   |
| Salori Palumbo C, et al. 2019                       | IBD     | 384    | 172 (44.8%)  | 212 (55.2%)  | 126 (32.8%)  | 65 (51.6%)   | 61 (48.4%)   | 31 (24.6%) | 13 (3.4%)   |
|                                                     | CD      | 248    | -            | -            | 78 (31.5%)   | -            | -            | -          | -           |
|                                                     | UC      | 136    | -            | -            | 48 (35.3%)   | -            | -            | -          | -           |
| Sarmini MT, et al. 2019                             | CD      | 159290 | -            | -            | 4190 (2.6%)  | 1564 (37.3%) | 2626 (62.7%) | -          | 2030 (1.3%) |
| Sarmini MT, et al. 2019                             | UC      | 125380 | -            | -            | 2450 (2%)    | 1051 (42.9%) | 1399 (57.1%) | -          | 1201 (0.9%) |
| Scrive B, et al. 2021                               | IBD     | 231    | 138 (59.7%)  | 93 (40.3%)   | 50 (21.6%)   | -            | -            | -          | -           |
| Silva J, et al. 2019                                | IBD     | 306    | 117 (38.2%)  | 189 (61.8%)  | 22 (7.2%)    | -            | -            | -          | -           |
|                                                     | CD      | 141    | -            | -            | 11 (7.8%)    | -            | -            | -          | -           |
|                                                     | UC      | 165    | -            | -            | 11 (6.7%)    | -            | -            | -          | -           |
| Simon TG, et al. 2018                               | CD      | 462    | 216 (46.8%)  | 246 (53.2%)  | 242 (52.4%)  | -            | -            | 32 (13.2%) | -           |
| Sourianarayanane A, et al. 2013                     | IBD     | 928    | -            | -            | 76 (8.2%)    | -            | -            | -          | 39 (4.2%)   |
| Sousa P, et al. 2021                                | IBD     | 115    | 48 (41.7%)   | 67 (58.3%)   | 55 (47.8%)   | -            | -            | 13 (23.6%) | -           |
| Spagnuolo R, et al. 2020                            | IBD     | 89     | 56 (62.9%)   | 33 (37.1%)   | 59 (66.3%)   | -            | -            | -          | -           |
| Stoleru G, et al. 2020                              | IBD     | 1673   | -            | -            | 208 (12.4%)  | -            | -            | 6 (2.9%)   | 3 (0.2%)    |

|                                  |     |      |            |            |            |            |            |           |            |
|----------------------------------|-----|------|------------|------------|------------|------------|------------|-----------|------------|
| Thayumanavan JG, et al. 2010     | IBD | 39   | 11 (28.2%) | 28 (71.8%) | 9 (23.1%)  | -          | -          | -         | -          |
| Thin LW, et al. 2012             | IBD | 110  | 52 (47.3%) | 58 (52.7%) | 7 (6.4%)   | -          | -          | -         | -          |
| Tirath A, et al. 2019            | CD  | 100  | 63 (63%)   | 37 (37%)   | 42 (42%)   | 33 (78.6%) | 9 (21.4%)  | 6 (14.3%) | 5 (5%)     |
| Van Lingen E, et al. 2022        | IBD | 82   | 46 (56.1%) | 36 (43.9%) | 32 (39%)   | -          | -          | 16 (50%)  | -          |
| Veltkamp C, et al. 2022          | IBD | 132  | 57 (43.2%) | 75 (56.8%) | 40 (30.3%) | 17 (42.5%) | 23 (57.5%) | 7 (17.5%) | -          |
|                                  | CD  | 79   | 31 (39.2%) | 48 (60.8%) | 27 (34.2%) | -          | -          | -         | -          |
|                                  | UC  | 53   | 40 (75.5%) | 13 (24.5%) | 13 (24.5%) | -          | -          | -         | -          |
| Voss J, et al. 2021              | IBD | 5422 | -          | -          | 11 (0.2%)  | -          | -          | -         | -          |
|                                  | CD  | 1738 | 747 (43%)  | 991 (57%)  | 5 (0.3%)   | -          | -          | -         | -          |
|                                  | UC  | 3684 | 1916 (52%) | 1768 (48%) | 6 (0.2%)   | -          | -          | -         | -          |
| Yamamoto-Furusho JK, et al. 2010 | UC  | 200  | 106 (53%)  | 94 (47%)   | 50 (25%)   | -          | -          | 1 (2%)    | -          |
| Yen H-H, et al. 2021             | IBD | 81   | 58 (71.6%) | 23 (28.4%) | 24 (29.6%) | 18 (75%)   | 6 (25%)    | 5 (20.8%) | 18 (22.2%) |
|                                  | CD  | 36   | 28 (77.8%) | 8 (22.2%)  | 11 (30.6%) | -          | -          | -         | -          |
|                                  | UC  | 45   | 30 (66.7%) | 15 (33.3%) | 13 (29.9%) | -          | -          | -         | -          |
| Young S, et al. 2015             | CD  | 846  | -          | -          | 86 (10.2%) | -          | -          | -         | -          |

n, number of patients; IBD, inflammatory bowel disease; NAFLD, Non-alcoholic fatty liver disease; MAFLD, Metabolic associated fatty liver disease; CD, Crohn's disease; UC, Ulcerative colitis.

**Table S4.** Joanna Briggs Institute critical appraisal checklist for studies reporting prevalence data applied for included studies in the systematic review.

| Author. year                  | 1. Was the sample frame appropriate to address the target population? | 2. Were study participants sampled in an appropriate way? | 3. Was the sample size adequate? | 4. Were the study subjects and the setting described in detail? | 5. Was the data analysis conducted with sufficient coverage of the identified sample? | 6. Were valid methods used for the identification of the condition? | 7. Was the condition measured in a standard, reliable way for all participants? | 8. Was there appropriate statistical analysis? | 9. Was the response rate adequate, and if not, was the low response rate managed appropriately? |
|-------------------------------|-----------------------------------------------------------------------|-----------------------------------------------------------|----------------------------------|-----------------------------------------------------------------|---------------------------------------------------------------------------------------|---------------------------------------------------------------------|---------------------------------------------------------------------------------|------------------------------------------------|-------------------------------------------------------------------------------------------------|
| Abomhya A, et al. 2022        | Yes                                                                   | Yes                                                       | Yes                              | Yes                                                             | Yes                                                                                   | Unclear                                                             | Unclear                                                                         | Yes                                            | NA                                                                                              |
| Almohannadi M, et al. 2020    | Yes                                                                   | Unclear                                                   | Yes                              | No                                                              | Yes                                                                                   | No                                                                  | Unclear                                                                         | Yes                                            | NA                                                                                              |
| Andrade P, et al. 2016        | Unclear                                                               | Unclear                                                   | No                               | No                                                              | Yes                                                                                   | No                                                                  | Unclear                                                                         | Yes                                            | NA                                                                                              |
| Areira C, et al. 2019         | Unclear                                                               | Unclear                                                   | Unclear                          | Yes                                                             | Yes                                                                                   | Yes                                                                 | Yes                                                                             | Yes                                            | NA                                                                                              |
| Atanassova A,et al. 2019      | Unclear                                                               | Unclear                                                   | Yes                              | No                                                              | Yes                                                                                   | Unclear                                                             | Yes                                                                             | Yes                                            | NA                                                                                              |
| Balaban D, et al. 2017        | Unclear                                                               | Yes                                                       | No                               | Unclear                                                         | Yes                                                                                   | Yes                                                                 | Yes                                                                             | Yes                                            | NA                                                                                              |
| Bargiggia S, et al. 2003      | No                                                                    | Unclear                                                   | Yes                              | No                                                              | Yes                                                                                   | Yes                                                                 | Yes                                                                             | Yes                                            | NA                                                                                              |
| Basaranoglu M, et al. 2015    | Unclear                                                               | Unclear                                                   | Yes                              | No                                                              | Yes                                                                                   | Unclear                                                             | Unclear                                                                         | Yes                                            | NA                                                                                              |
| Ben Mohamed A, et al. 2019    | Yes                                                                   | Unclear                                                   | No                               | No                                                              | Yes                                                                                   | Unclear                                                             | Yes                                                                             | Yes                                            | NA                                                                                              |
| Bessissow T, et al. 2016      | No                                                                    | Yes                                                       | Yes                              | Yes                                                             | Yes                                                                                   | Yes                                                                 | Unclear                                                                         | Yes                                            | NA                                                                                              |
| Bosch DE, et al. 2017         | No                                                                    | Yes                                                       | No                               | Yes                                                             | Yes                                                                                   | Yes                                                                 | Yes                                                                             | Yes                                            | NA                                                                                              |
| Cahill J, et al. 2019         | Yes                                                                   | Unclear                                                   | Yes                              | Yes                                                             | Yes                                                                                   | Unclear                                                             | Yes                                                                             | Yes                                            | NA                                                                                              |
| Carrillo-Palau M, et al. 2021 | No                                                                    | Yes                                                       | Unclear                          | Yes                                                             | Yes                                                                                   | Yes                                                                 | Yes                                                                             | Yes                                            | NA                                                                                              |
| Cheikhna F, et al. 2020       | Unclear                                                               | Unclear                                                   | Yes                              | No                                                              | Yes                                                                                   | Unclear                                                             | Unclear                                                                         | Yes                                            | NA                                                                                              |
| Chhina S, et al. 2014         | Unclear                                                               | Yes                                                       | Yes                              | No                                                              | Yes                                                                                   | Unclear                                                             | Unclear                                                                         | Yes                                            | NA                                                                                              |
| Chicco F, et al. 2021         | Yes                                                                   | Yes                                                       | Unclear                          | Yes                                                             | Yes                                                                                   | Yes                                                                 | Yes                                                                             | Yes                                            | NA                                                                                              |
| Cohen ME, et al. 2021         | Unclear                                                               | Yes                                                       | No                               | Yes                                                             | Yes                                                                                   | Yes                                                                 | Yes                                                                             | Yes                                            | NA                                                                                              |
| Crispino F, et al. 2022       | Unclear                                                               | Yes                                                       | Yes                              | No                                                              | Yes                                                                                   | Yes                                                                 | Unclear                                                                         | Yes                                            | NA                                                                                              |
| Daniluk U, et al. 2021        | Yes                                                                   | Yes                                                       | Unclear                          | Yes                                                             | Yes                                                                                   | Unclear                                                             | Yes                                                                             | Yes                                            | NA                                                                                              |
| Demir M. 2020                 | Yes                                                                   | Yes                                                       | Yes                              | Unclear                                                         | Yes                                                                                   | Unclear                                                             | Yes                                                                             | Yes                                            | NA                                                                                              |
| Di Girolamo M, et al. 2013    | Yes                                                                   | Yes                                                       | Unclear                          | No                                                              | Yes                                                                                   | Unclear                                                             | Yes                                                                             | Yes                                            | NA                                                                                              |
| Domislovic V, et al. 2019     | Unclear                                                               | Unclear                                                   | Unclear                          | Unclear                                                         | Yes                                                                                   | Yes                                                                 | Yes                                                                             | Yes                                            | NA                                                                                              |
| Dorobăț A, et al. 2018        | Unclear                                                               | Unclear                                                   | Unclear                          | No                                                              | Yes                                                                                   | Unclear                                                             | Yes                                                                             | Yes                                            | NA                                                                                              |
| Dundulis J, et al. 2014       | Yes                                                                   | Yes                                                       | No                               | Unclear                                                         | Yes                                                                                   | Unclear                                                             | Yes                                                                             | Yes                                            | NA                                                                                              |
| Dunn M, et al. 2012           | Unclear                                                               | Yes                                                       | Yes                              | Unclear                                                         | Yes                                                                                   | Unclear                                                             | Unclear                                                                         | Yes                                            | NA                                                                                              |
| El Mahjoubi S, et al. 2017    | Unclear                                                               | Yes                                                       | No                               | No                                                              | Yes                                                                                   | Unclear                                                             | Yes                                                                             | Yes                                            | NA                                                                                              |
| Elchert JA, et al. 2018       | Unclear                                                               | Yes                                                       | Yes                              | Unclear                                                         | Yes                                                                                   | Unclear                                                             | Yes                                                                             | Yes                                            | NA                                                                                              |
| Elchert JA, et al. 2018       | Unclear                                                               | Yes                                                       | Yes                              | Unclear                                                         | Yes                                                                                   | Unclear                                                             | Yes                                                                             | Yes                                            | NA                                                                                              |
| Erzin Y, et al. 2015          | Unclear                                                               | Yes                                                       | Yes                              | Unclear                                                         | Yes                                                                                   | Unclear                                                             | Yes                                                                             | Yes                                            | NA                                                                                              |
| Gilcă-Blanariu G, et al. 2020 | Yes                                                                   | Yes                                                       | Yes                              | Unclear                                                         | Yes                                                                                   | Unclear                                                             | Unclear                                                                         | Yes                                            | NA                                                                                              |
| Glassner K, et al. 2017       | Unclear                                                               | Unclear                                                   | Yes                              | Yes                                                             | Yes                                                                                   | Unclear                                                             | No                                                                              | Yes                                            | NA                                                                                              |
| Gu P, et al. 2022             | Unclear                                                               | Yes                                                       | Yes                              | Yes                                                             | Yes                                                                                   | Unclear                                                             | Yes                                                                             | Yes                                            | NA                                                                                              |

|                                    |         |         |         |         |     |         |         |     |    |
|------------------------------------|---------|---------|---------|---------|-----|---------|---------|-----|----|
| Gupta A, et al. 2022               | Yes     | Yes     | Unclear | No      | Yes | Yes     | Yes     | Yes | NA |
| Hoffmann P, et al. 2020            | Unclear | Yes     | Yes     | Yes     | Yes | Unclear | Yes     | Yes | NA |
| Hong Q, et al. 2022                | Unclear | Yes     | Yes     | Yes     | Yes | Yes     | Yes     | Yes | NA |
| Iannone A, et al. 2017             | Yes     | Yes     | Yes     | Yes     | Yes | Unclear | Yes     | Yes | NA |
| Jubin K, et al. 2019               | Yes     | Yes     | No      | Unclear | Yes | Unclear | Yes     | Yes | NA |
| Kang MK, et al. 2020               | Unclear | Yes     | Yes     | Yes     | Yes | Unclear | Yes     | Yes | NA |
| Kani HT, et al. 2019               | Unclear | Yes     | Unclear | Unclear | Yes | Yes     | Yes     | Yes | NA |
| Karmiris K, et al. 2014            | Unclear | Unclear | Yes     | No      | Yes | Unclear | Yes     | Yes | NA |
| Kasarala G, et al. 2017            | Unclear | Yes     | Yes     | No      | Yes | Unclear | Yes     | Yes | NA |
| Koller T, et al. 2017              | Yes     | Yes     | Unclear | Yes     | Yes | Unclear | Unclear | Yes | NA |
| Kumar-Dixit V, et al. 2020         | Unclear | Unclear | Unclear | No      | Yes | Unclear | Unclear | Yes | NA |
| Le NHQ, et al. 2014                | Unclear | Yes     | Unclear | No      | Yes | Yes     | Yes     | Yes | NA |
| Lee A, et al. 2019                 | No      | Yes     | Unclear | No      | Yes | Unclear | Unclear | Yes | NA |
| Lee AS, et al. 2022                | Unclear | Yes     | No      | No      | Yes | Yes     | Yes     | Yes | NA |
| Li D, et al. 2017                  | No      | Yes     | Unclear | Unclear | Yes | Unclear | Yes     | Yes | NA |
| Likhitsup A, et al. 2019           | Unclear | Yes     | No      | Yes     | Yes | Unclear | Yes     | Yes | NA |
| Lopes M, et al. 2021               | No      | Yes     | No      | No      | Yes | Unclear | Yes     | Yes | NA |
| Magri S, et al. 2019               | Unclear | Yes     | Unclear | Yes     | Yes | Yes     | Yes     | Yes | NA |
| Mancina RM, et al. 2020            | No      | Yes     | Unclear | Yes     | Yes | Yes     | Yes     | Yes | NA |
| Martínez-Domínguez SJ, et al. 2022 | Yes     | Yes     | Yes     | No      | Yes | Yes     | Yes     | Yes | NA |
| McHenry S, et al. 2020             | Unclear | Yes     | Yes     | Yes     | Yes | Yes     | Yes     | Yes | NA |
| Mehrotra P, et al. 2013            | Unclear | Yes     | No      | No      | Yes | Unclear | Yes     | Yes | NA |
| Mehrotra P, et al. 2018            | Unclear | Yes     | Unclear | No      | Yes | Unclear | Yes     | Yes | NA |
| Mohammed T, et al. 2012            | No      | Yes     | Unclear | No      | Yes | Unclear | Yes     | Yes | NA |
| Monteserin L, et al. 2017          | Unclear | Yes     | No      | No      | Yes | Yes     | Yes     | Yes | NA |
| Morsy KH, et al. 2012              | No      | Yes     | No      | Yes     | Yes | Unclear | Yes     | Yes | NA |
| Nasrullayeva F, et al. 2020        | Unclear | Unclear | Yes     | No      | Yes | Unclear | Yes     | Yes | NA |
| Nguyen DL, et al. 2014             | Yes     | Yes     | Yes     | Yes     | Yes | Unclear | Yes     | Yes | NA |
| Paparo F, et al. 2012              | Unclear | Unclear | Yes     | Unclear | Yes | Unclear | Unclear | Yes | NA |
| Patel NP, et al. 2011              | Unclear | Yes     | Yes     | No      | Yes | Unclear | Yes     | Yes | NA |
| Perrett AD, et al. 1971            | Unclear | Unclear | Yes     | Unclear | Yes | Unclear | No      | Yes | NA |
| Perrett AD, et al. 1971            | Unclear | Unclear | Yes     | Unclear | Yes | Unclear | No      | Yes | NA |
| Principi M, et al. 2018            | Yes     | Yes     | Yes     | Yes     | Yes | Yes     | Yes     | Yes | NA |
| Regner E, et al. 2020              | Unclear | Yes     | Yes     | No      | Yes | Unclear | Yes     | Yes | NA |
| Restellini S, et al. 2017          | Yes     | Yes     | Yes     | Unclear | Yes | Yes     | Yes     | Yes | NA |
| Ritaccio G, et al. 2021            | Yes     | Yes     | Yes     | Yes     | Yes | Unclear | No      | Yes | NA |
| Rodríguez-Duque JC, et al. 2023    | No      | Yes     | Yes     | Yes     | Yes | Yes     | Yes     | Yes | NA |
| Sagami S, et al. 2017              | Unclear | Unclear | Yes     | Yes     | Yes | Yes     | Yes     | Yes | NA |
| Saroli Palumbo C, et al. 2019      | Unclear | Yes     | Yes     | Yes     | Yes | Yes     | Yes     | Yes | NA |

|                                  |         |         |         |         |     |         |         |     |    |
|----------------------------------|---------|---------|---------|---------|-----|---------|---------|-----|----|
| Sarmini MT, et al. 2019          | Unclear | Unclear | Yes     | Unclear | Yes | Unclear | Unclear | Yes | NA |
| Sarmimi MT, et al. 2019          | Unclear | Unclear | Yes     | Unclear | Yes | Unclear | Unclear | Yes | NA |
| Scrivo B, et al. 2021            | Yes     | Unclear | Yes     | Unclear | Yes | Yes     | Yes     | Yes | NA |
| Silva J, et al 2019              | Yes     | Yes     | Yes     | Yes     | Yes | Unclear | Unclear | Yes | NA |
| Simon TG, et al. 2018            | Yes     | Yes     | Yes     | Yes     | Yes | Unclear | Yes     | Yes | NA |
| Sourianarayanane A, et al. 2013  | Unclear | Yes     | Yes     | Yes     | Yes | Yes     | Unclear | Yes | NA |
| Sousa P, et al. 2021             | Yes     | Unclear | Unclear | Unclear | Yes | Yes     | Yes     | Yes | NA |
| Spagnuolo R, et al. 2019         | Unclear | Unclear | No      | Yes     | Yes | Yes     | Yes     | Yes | NA |
| Stoleru G, et al. 2020           | Unclear | Unclear | Yes     | Unclear | Yes | Unclear | Yes     | Yes | NA |
| Thayumanavan JG, et al. 2010     | Unclear | Unclear | No      | No      | Yes | No      | Unclear | Yes | NA |
| Thin LW, et al. 2012             | Yes     | Unclear | Unclear | Unclear | Yes | Yes     | Yes     | Yes | NA |
| Tirath A, et al. 2019            | Unclear | Yes     | Unclear | No      | Yes | Yes     | Yes     | Yes | NA |
| Van Lingen E, et al. 2022        | Yes     | Yes     | Unclear | Yes     | Yes | Yes     | Yes     | Yes | NA |
| Veltkamp C, et al. 2022          | Unclear | Yes     | Unclear | Yes     | Yes | Yes     | Yes     | Yes | NA |
| Voss J, et al. 2021              | Yes     | Yes     | Yes     | Yes     | Yes | Unclear | Unclear | Yes | NA |
| Yamamoto-Furusho JK, et al. 2010 | Yes     | Yes     | Yes     | Yes     | Yes | Unclear | Unclear | Yes | NA |
| Yen H-H, et al. 2021             | Unclear | Yes     | Unclear | Yes     | Yes | Yes     | Yes     | Yes | NA |
| Young S, et al. 2015             | Unclear | Unclear | Yes     | No      | Yes | No      | Yes     | Yes | NA |

**Table S5.** Pooled prevalence (proportion with 95% confidence intervals) of non-alcoholic fatty liver disease in patients with inflammatory bowel disease according to diagnostic methods used.

| Diagnostic Method                         | n  | % (95% Confidence Interval) | I <sup>2</sup> |
|-------------------------------------------|----|-----------------------------|----------------|
| Controlled attenuation parameter          | 17 | 38.8 (33.1 – 44.7)          | 90.3           |
| Biopsy after altered liver function tests | 4  | 30.7 (22.8 – 39.1)          | 47.1           |
| Hepatic Steatosis Index                   | 6  | 30.4 (26.1 – 35)            | 66.8           |
| Ultrasounds                               | 28 | 28.5 (23.1 – 34.2)          | 97.4           |
| Magnetic resonance imaging                | 4  | 25.1 (13.1 – 39.5)          | 93.8           |
| Fatty Liver Index                         | 2  | 23.8 (10.9 – 37.8)          | -              |
| Computed tomography                       | 5  | 23.2 (7.6 – 44.3)           | 98.6           |
| Multiple methods                          | 5  | 20 (10.8 – 31.3)            | 98.7           |
| Imaging (with no details)                 | 4  | 13.8 (9.1 – 19.4)           | 93.1           |
| Administrative databases                  | 5  | 13 (4.5 – 25.9)             | 99.9           |
| No method described                       | 8  | 11.5 (7.1 – 16.6)           | 93.3           |
| ICD Codes                                 | 6  | 4 (2.8 – 11.7)              | 99.9           |

n, number of studies, ICD: International Classification of Diseases.

**Table S6.** Pooled prevalence (proportion with 95% confidence intervals) liver fibrosis in patients with inflammatory bowel disease and non-alcoholic fatty liver disease (NAFLD), overall and according to diagnostic methods used.

| Diagnostic Method        | n  | % (95% Confidence Interval) | I <sup>2</sup> |
|--------------------------|----|-----------------------------|----------------|
| Fibrosis overall         | 20 | 16.7 (12.2 – 21.7)          | 88.9           |
| Transient elastography   | 11 | 23.6 (17.4 – 30.4)          | 83.7           |
| Fibrosis-4 (FIB.4) index | 6  | 14.2 (8.2 – 21.4)           | 83.9           |
| NAFLD Fibrosis Score     | 2  | 3.7 (2 – 5.3)               | -              |

n, number of studies; I<sup>2</sup>, inconsistency.

**Table S7.** Number of patients (n) and prevalence of cardiometabolic risk factors in patients with inflammatory bowel disease evaluated for the presence of non-alcoholic fatty liver disease.

| Author, year                   | Disease type | Obesity/Over weight n (%) | Type-2 diabetes n (%) | Waist circumference ≥ 90 cm in men and ≥ 80 cm in women | Metabolic factors n (%)                                           |                                                                      |                                                                     |                                                                                                                                |                                         |                                                                       |
|--------------------------------|--------------|---------------------------|-----------------------|---------------------------------------------------------|-------------------------------------------------------------------|----------------------------------------------------------------------|---------------------------------------------------------------------|--------------------------------------------------------------------------------------------------------------------------------|-----------------------------------------|-----------------------------------------------------------------------|
|                                |              |                           |                       |                                                         | Blood pressure ≥ 130/85 mmHg or requiring specific drug treatment | Triglyceride levels ≥ 150 mg/dL or requiring specific drug treatment | HDL cholesterol levels < 40 mg/ dL for men and < 50 mg/dL for women | Prediabetes (i.e., fasting glucose levels 100–125 mg/dL, or 2-h post-load glucose levels 140 to 199 mg/dL, or HbA1c 5.7%-6.4%) | C-reactive protein (CRP) level > 2 mg/L | Homeostasis model assessment (HOMA) of insulin resistance score ≥ 2.5 |
| <i>Abomhyaa A, et al. 2022</i> | CD           | 1522 (28.9%)              | 1501 (28.5%)          | -                                                       | 2186 (41.5%)                                                      | 1485 (28.2%)                                                         | -                                                                   | -                                                                                                                              | -                                       | -                                                                     |
| <i>Areira C, et al. 2019</i>   | IBD          | 21 (28.8%)                | 8 (11%)               | -                                                       | 16 (21.9%)                                                        | -                                                                    | -                                                                   | -                                                                                                                              | -                                       | -                                                                     |
| <i>Bessissow T, et al 2016</i> | IBD          | 3 (2.8%)                  | 9 (8.9%)              | -                                                       | 11 (10.2%)                                                        | -                                                                    | -                                                                   | -                                                                                                                              | -                                       | -                                                                     |
| <i>Bosch DE, et al 2017</i>    | IBD          | -                         | 6 (20%)               | -                                                       | 9 (32%)                                                           | -                                                                    | -                                                                   | -                                                                                                                              | -                                       | -                                                                     |
| <i>Cahill J, et al. 2019</i>   | IBD          | 79 (53.3%)                | 26 (17.2%)            | -                                                       | 35 (23.3%)                                                        | -                                                                    | -                                                                   | -                                                                                                                              | 23 (36.5%)                              | -                                                                     |
| <i>Cohen ME, et al. 2021</i>   | IBD          | 2 (40%)                   | -                     | -                                                       | -                                                                 | -                                                                    | -                                                                   | -                                                                                                                              | -                                       | -                                                                     |
| <i>Dorobăț A, et al. 2018</i>  | IBD          | -                         | -                     | -                                                       | -                                                                 | -                                                                    | -                                                                   | -                                                                                                                              | -                                       | 16 (59.3%)                                                            |
| <i>Dundulis J, et al. 2014</i> | IBD          | -                         | 8 (27.6%)             | -                                                       | -                                                                 | -                                                                    | -                                                                   | -                                                                                                                              | -                                       | -                                                                     |
| <i>Elchert JA, et al. 2018</i> | CD           | 312 (60%)                 | 270 (52%)             | -                                                       | -                                                                 | -                                                                    | -                                                                   | -                                                                                                                              | -                                       | 468 (90%)                                                             |
| <i>Elchert JA, et al. 2018</i> | UC           | 211 (57%)                 | 218 (59%)             | -                                                       | 369 (71%)                                                         | -                                                                    | 338 (65%)                                                           | -                                                                                                                              | -                                       | 359 (97%)                                                             |
| <i>Glassner K, et al. 2017</i> | IBD          | 23 (41.1%)                | 9 (16.1%)             | -                                                       | 281 (76%)                                                         | -                                                                    | 281 (76%)                                                           | -                                                                                                                              | -                                       | -                                                                     |
| <i>Hoffmann P, et al. 2020</i> | IBD          | -                         | 13 (6.1%)             | -                                                       | 19 (33.9%)                                                        | -                                                                    | -                                                                   | -                                                                                                                              | -                                       | -                                                                     |
| <i>Hong Q, et al. 2022</i>     | CD           | -                         | 7 (4.8%)              | -                                                       | -                                                                 | -                                                                    | -                                                                   | -                                                                                                                              | -                                       | -                                                                     |
| <i>Kang MK, et al. 2020</i>    | UC           | -                         | 6 (8.8%)              | -                                                       | -                                                                 | -                                                                    | -                                                                   | -                                                                                                                              | -                                       | -                                                                     |
| <i>Kasarala G, et al. 2017</i> | CD           | -                         | -                     | -                                                       | -                                                                 | -                                                                    | 29 (34.9%)                                                          | -                                                                                                                              | -                                       | -                                                                     |
| <i>Magri S, et al. 2019</i>    | IBD          | 11 (22.4%)                | 5 (10.2%)             | -                                                       | 11 (22.5%)                                                        | -                                                                    | 18 (36.7%)                                                          | -                                                                                                                              | -                                       | -                                                                     |
| <i>McHenry S, et al. 2020</i>  | IBD          | 1246 (22.3%)              | -                     | -                                                       | -                                                                 | -                                                                    | -                                                                   | -                                                                                                                              | -                                       | -                                                                     |
| <i>Principi M, et al. 2018</i> | IBD          | 22 (30.6%)                | 7 (9.7%)              | -                                                       | -                                                                 | -                                                                    | 22 (30.6%)                                                          | -                                                                                                                              | -                                       | -                                                                     |
| <i>Regner E, et al. 2020</i>   | CD           | 77 (65.3%)                | 15 (12.7%)            | -                                                       | 45 (38.1%)                                                        | -                                                                    | 20 (16.9%)                                                          | -                                                                                                                              | -                                       | -                                                                     |
| <i>Ritaccio G, et al. 2021</i> | IBD          | -                         | 18 (13.8%)            | 57 (43.8%)                                              | 42 (32.3%)                                                        | -                                                                    | -                                                                   | -                                                                                                                              | -                                       | -                                                                     |
|                                | IBD          | 4 (66.7%)                 | -                     | -                                                       | -                                                                 | -                                                                    | -                                                                   | -                                                                                                                              | -                                       | -                                                                     |
|                                | CD           | 3 (75%)                   | -                     | -                                                       | -                                                                 | -                                                                    | -                                                                   | -                                                                                                                              | -                                       | -                                                                     |
|                                | UC           | 1 (50%)                   | -                     | -                                                       | -                                                                 | -                                                                    | -                                                                   | -                                                                                                                              | -                                       | -                                                                     |
|                                | IBD          | 121 (58.5%)               | -                     | -                                                       | -                                                                 | -                                                                    | -                                                                   | -                                                                                                                              | -                                       | -                                                                     |
|                                | IBD          | -                         | 51 (6.1%)             | -                                                       | 197 (23.7%)                                                       | -                                                                    | -                                                                   | -                                                                                                                              | -                                       | -                                                                     |

|                                        |     |              |              |   |              |   |            |   |   |   |
|----------------------------------------|-----|--------------|--------------|---|--------------|---|------------|---|---|---|
| <i>Rodriguez-Duque JC ,et al. 2023</i> | CD  | -            | -            | - | -            | - | -          | - | - | - |
|                                        | UC  | -            | -            | - | -            | - | -          | - | - | - |
| <i>Sagami S, et al. 2017</i>           | CD  | 24 (36.4%)   | -            | - | -            | - | -          | - | - | - |
| <i>Saroli Palumbo C, et al. 2019</i>   | IBD | -            | 13 (10.3%)   | - | 26 (20.6%)   | - | -          | - | - | - |
| <i>Sarmini MT, et al. 2019</i>         | CD  | 2030 (48.4%) | 1775 (42.4%) | - | -            | - | -          | - | - | - |
|                                        | UC  | 1370 (55.9%) | 1320 (53.9%) | - | 2021 (82.5%) | - | -          | - | - | - |
| <i>Sourianarayanan A, et al. 2013</i>  | IBD | 39 (51.3%)   | 9 (11.8%)    | - | 21 (27.6%)   | - | 22 (28.9%) | - | - | - |
| <i>Stoleru G, et al. 2020</i>          | IBD | -            | 3 (1.4%)     | - | 6 (2.8%)     | - | -          | - | - | - |
| <i>Tirath A, et al. 2019</i>           | CD  | -            | 5 (11.9%)    | - | -            | - | -          | - | - | - |
| <i>Yen H-H, et al. 2021</i>            | IBD | 18 (75%)     | 3 (12.5%)    |   |              |   |            |   |   |   |



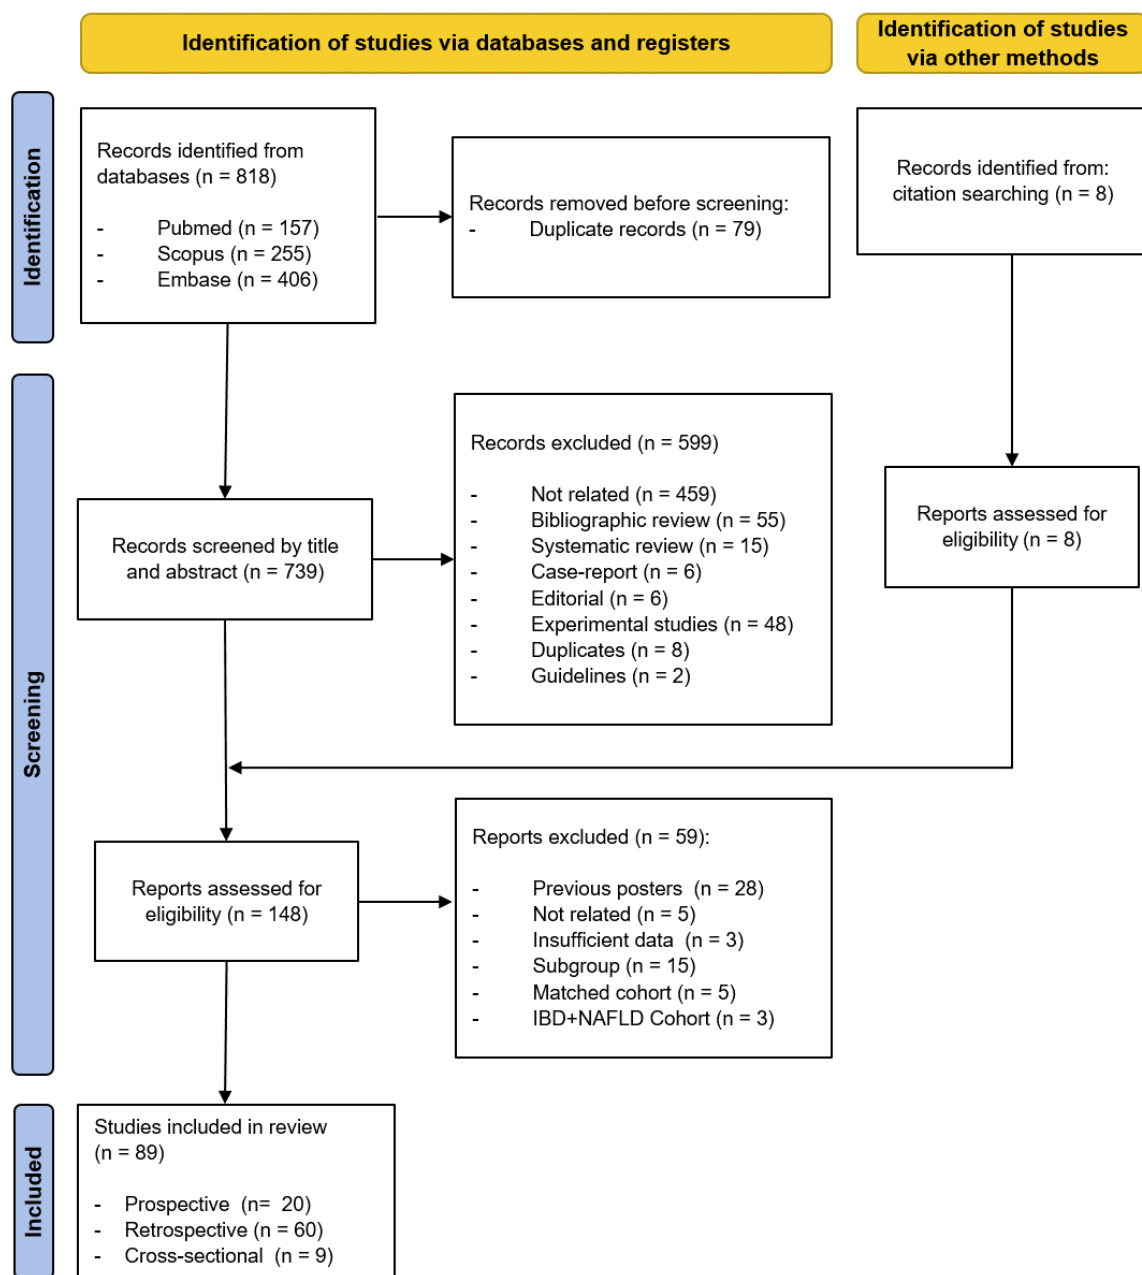

**Figure S1.** PRISMA flow diagram of study selection process.

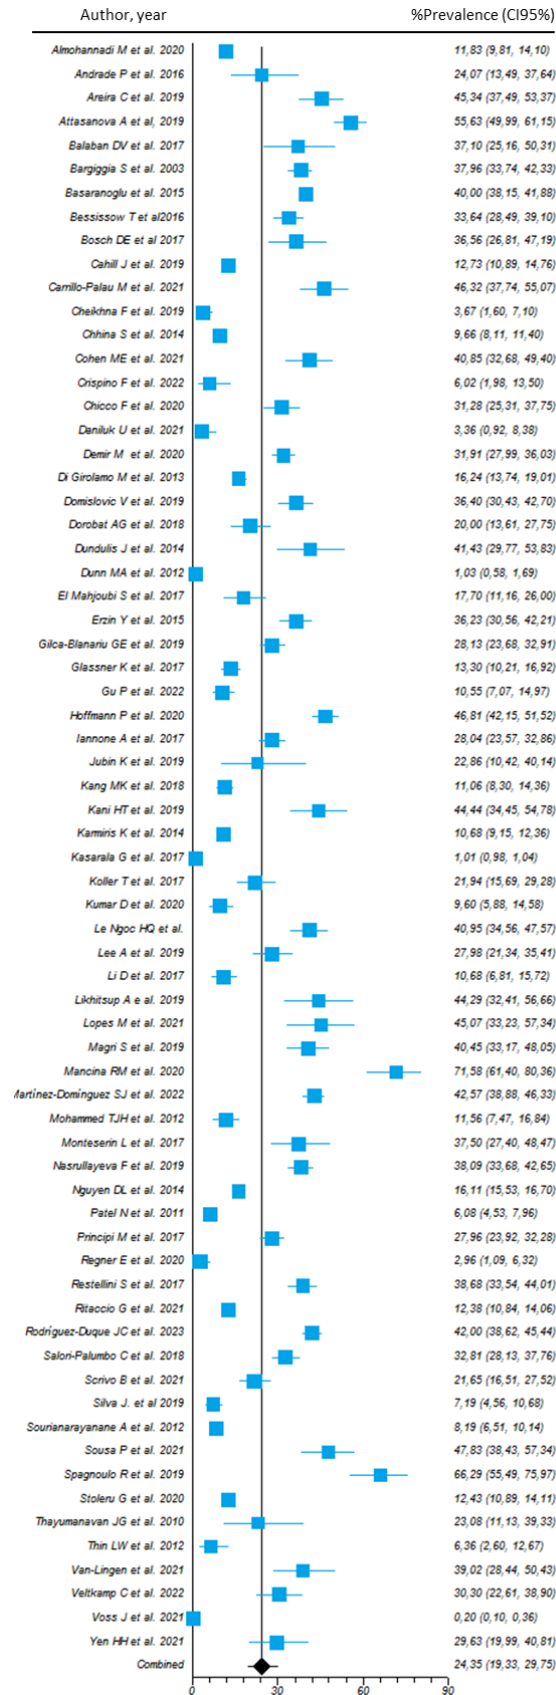

Figure S2. Forest plots of pooled prevalence for nonalcoholic fatty liver disease in patients with inflammatory bowel disease overall.

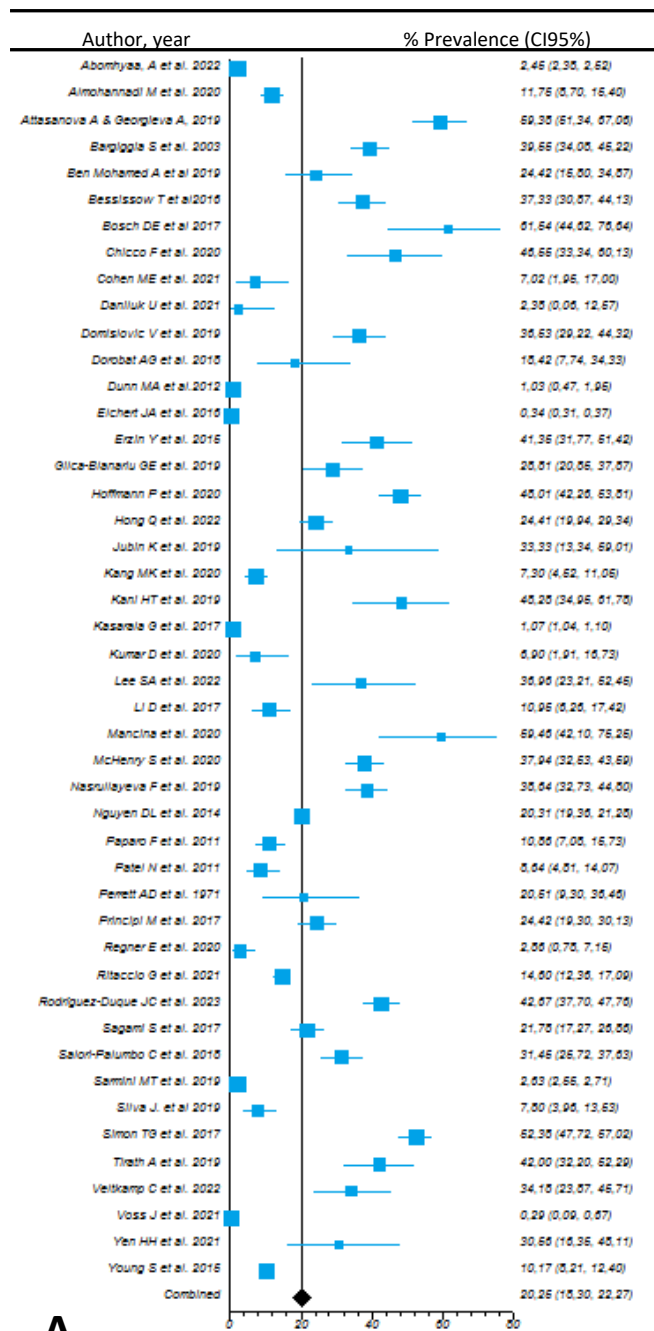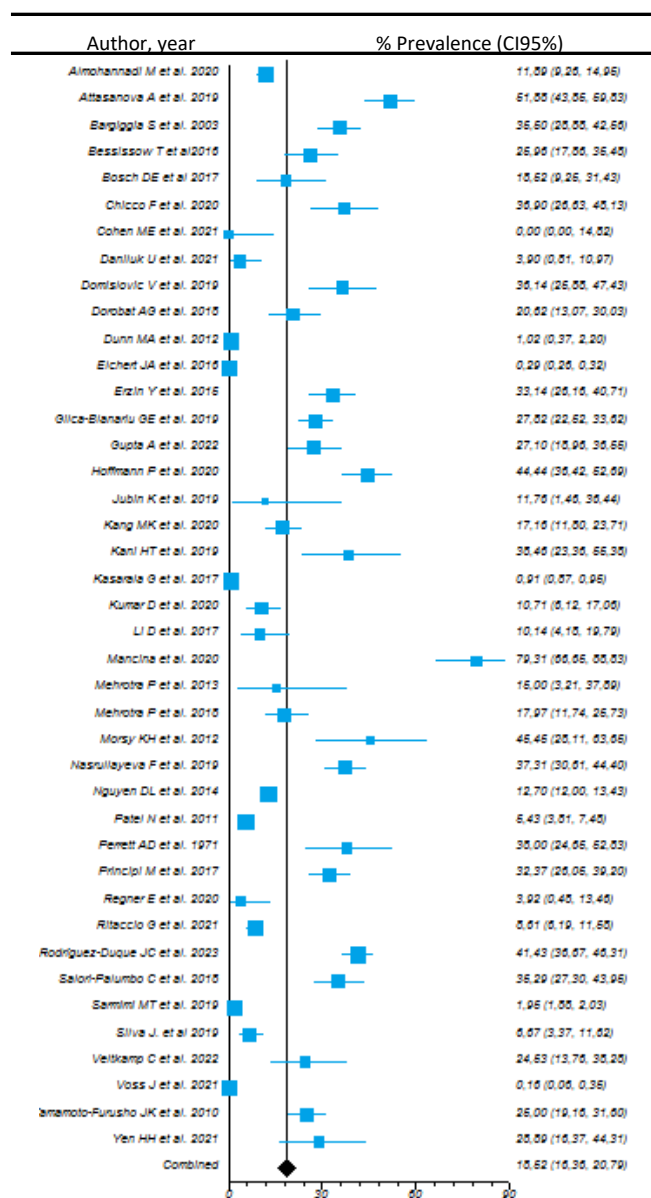

**Figure S3.** Forest plot of the pooled prevalence of non-alcoholic fatty liver disease in patients with Crohn's disease (A) and ulcerative colitis (B).

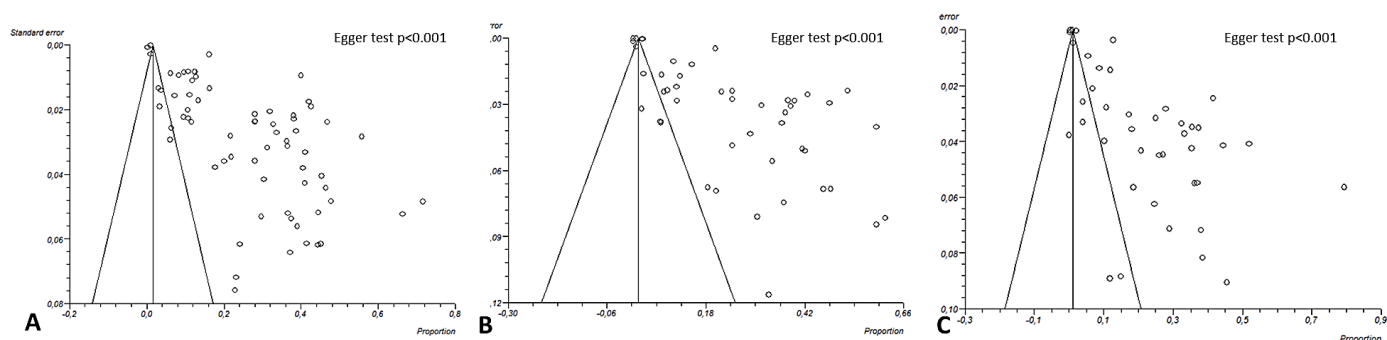

**Figure S4.** Funnel plot for publication bias of studies reporting on the prevalence of non-alcoholic fatty liver disease in patients with inflammatory bowel disease overall (A), Crohn's disease (B) and ulcerative colitis (C). Significant publication bias was found in Egger and Begg tests.

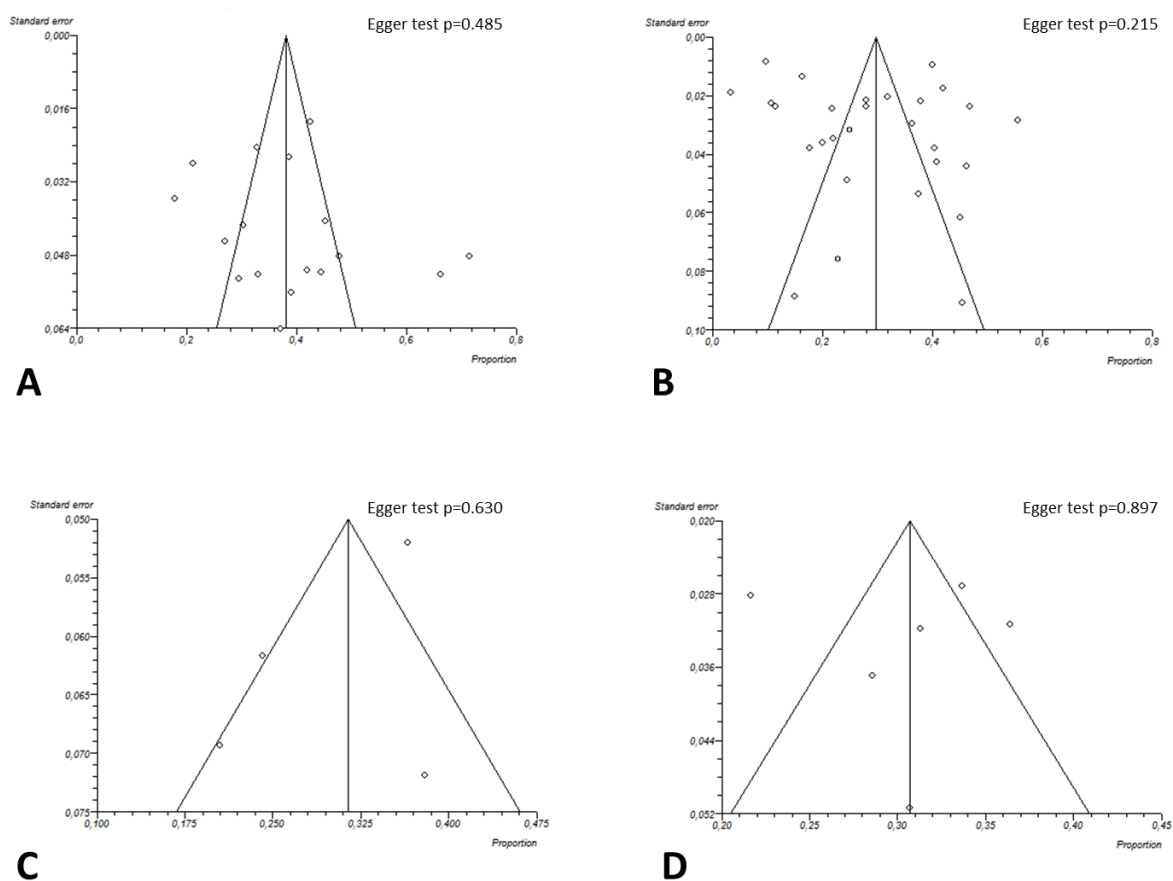

**Figure S5.** Funnel plots of the studies reporting on the prevalence of non-alcoholic fatty liver disease assessed by (A) controlled attenuation parameter (CAP) measure; (B) liver ultrasound; (C) liver biopsy; and (D) hepatitis steatosis index (HIS) score.

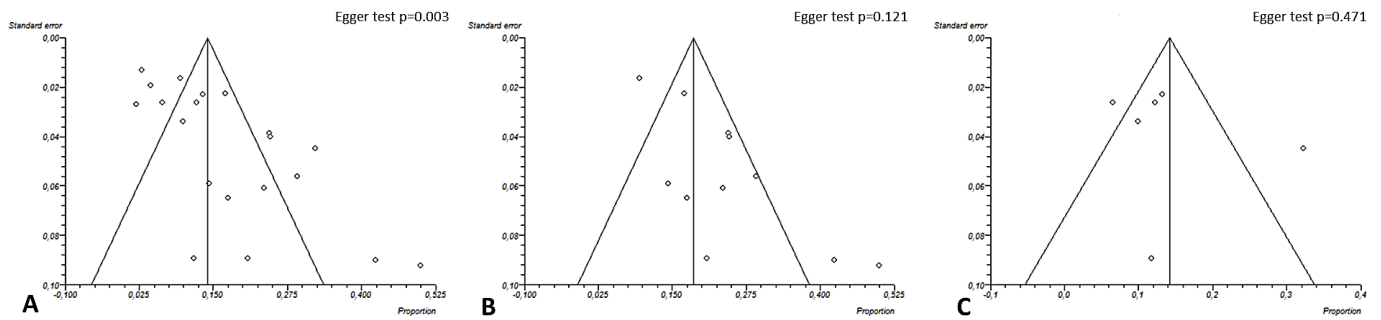

**Figure S6.** Funnel plots of the studies reporting on fibrosis in patients with inflammatory disease who presented non-alcoholic fatty liver disease, when it was assessed by any method (A), transient elastography (B) or biochemical indexes (C).

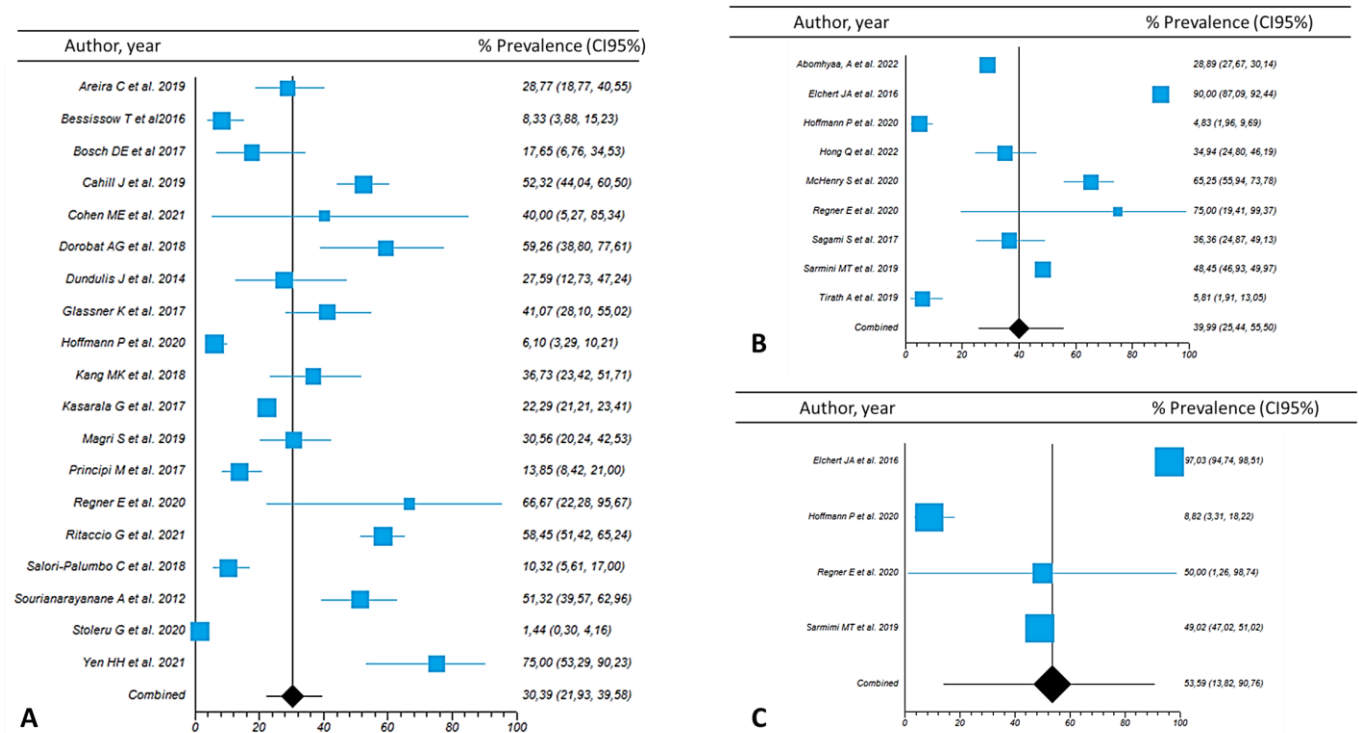

**Figure S7.** Forest plot of the pooled prevalence of metabolic (dysfunction-) associated fatty liver disease among patients with inflammatory bowel disease overall (B), Crohn's disease (B) and ulcerative colitis (C) who present non-alcoholic fatty liver disease.

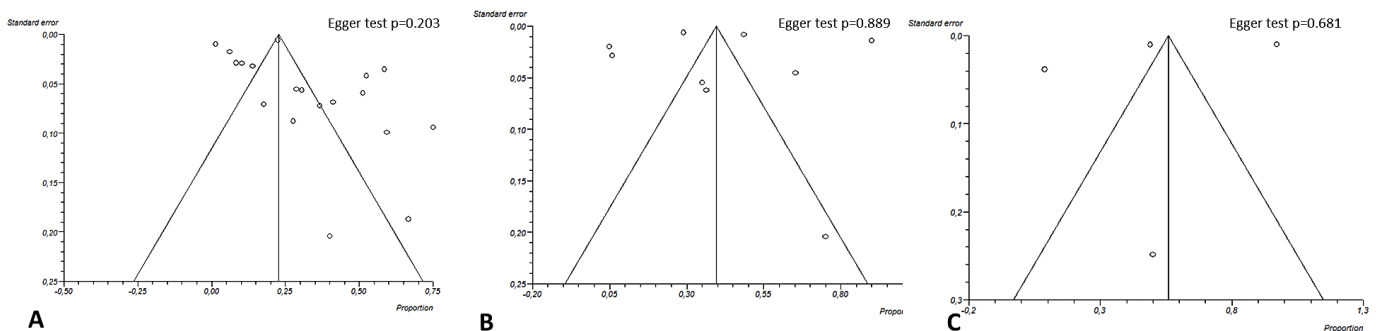

**Figure S8.** Funnel plots of the studies reporting on the pooled prevalence of metabolic (dysfunction-) associated fatty liver disease among patients with inflammatory bowel disease overall (B), Crohn's disease (B) and ulcerative colitis (C) who present non-alcoholic fatty liver disease.
